# Supplementary material for: Cyclin C directly stimulates Drp1 GTP affinity to mediate stress-induced mitochondrial hyperfission
Source: PubMed Central journal article supplement — Mol Biol Cell. 2019 Feb 1;30(3):302–11. doi: 10.1091/mbc.E18-07-0463 (PMC6589575; doi:10.1091/mbc.e18-07-0463), 2019-02-01
Supplement: mbc-30-302-s001.pdf [file mbc-30-302-s001.pdf]

# Supplemental Materials

*Molecular Biology of the Cell*

Ganesan et al.

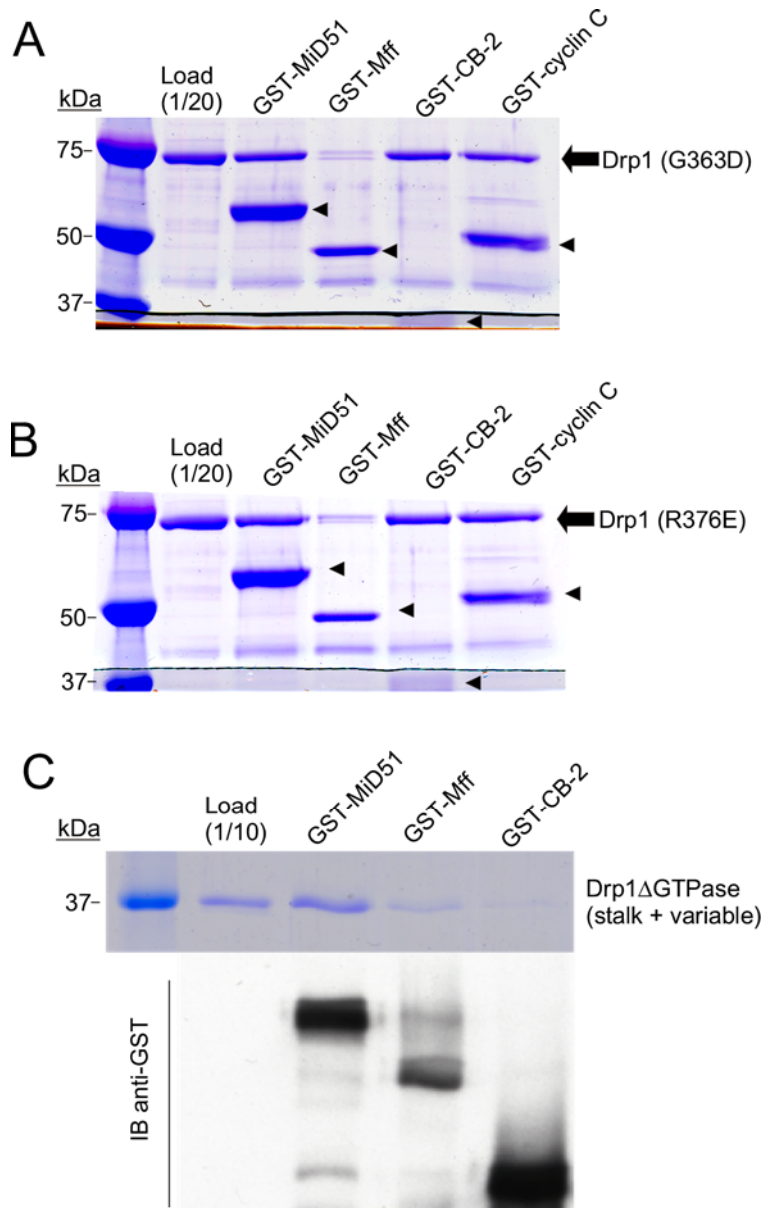

**Figure S1. Cyclin C and CB2 bind Drp1 mutants defective for oligomerization.** Pull-down experiments with 1 His<sub>6</sub>-Drp1 mutants G363D (A) and R376E (B) was performed with 1 GST-tagged MiD51( N118), Mff( TM), CB2 or cyclin C. The bait proteins were recovered with glutathione beads, resolved in SDS-PAGE and stained with Coomassie. Location of the Drp1 derivatives is indicated by the arrow. The GST-fusion bait proteins are indicated by the arrowheads. Molecular weight markers (kDa) are indicated on the

left. (C) The pulldown experiments were repeated as just described with the His<sub>6</sub>-Drp1 derivative deleted for the GTPase domain but containing the stalk and variable regions. Loading controls for the GST fusion proteins was accomplished by Western blot analysis probing for GST.

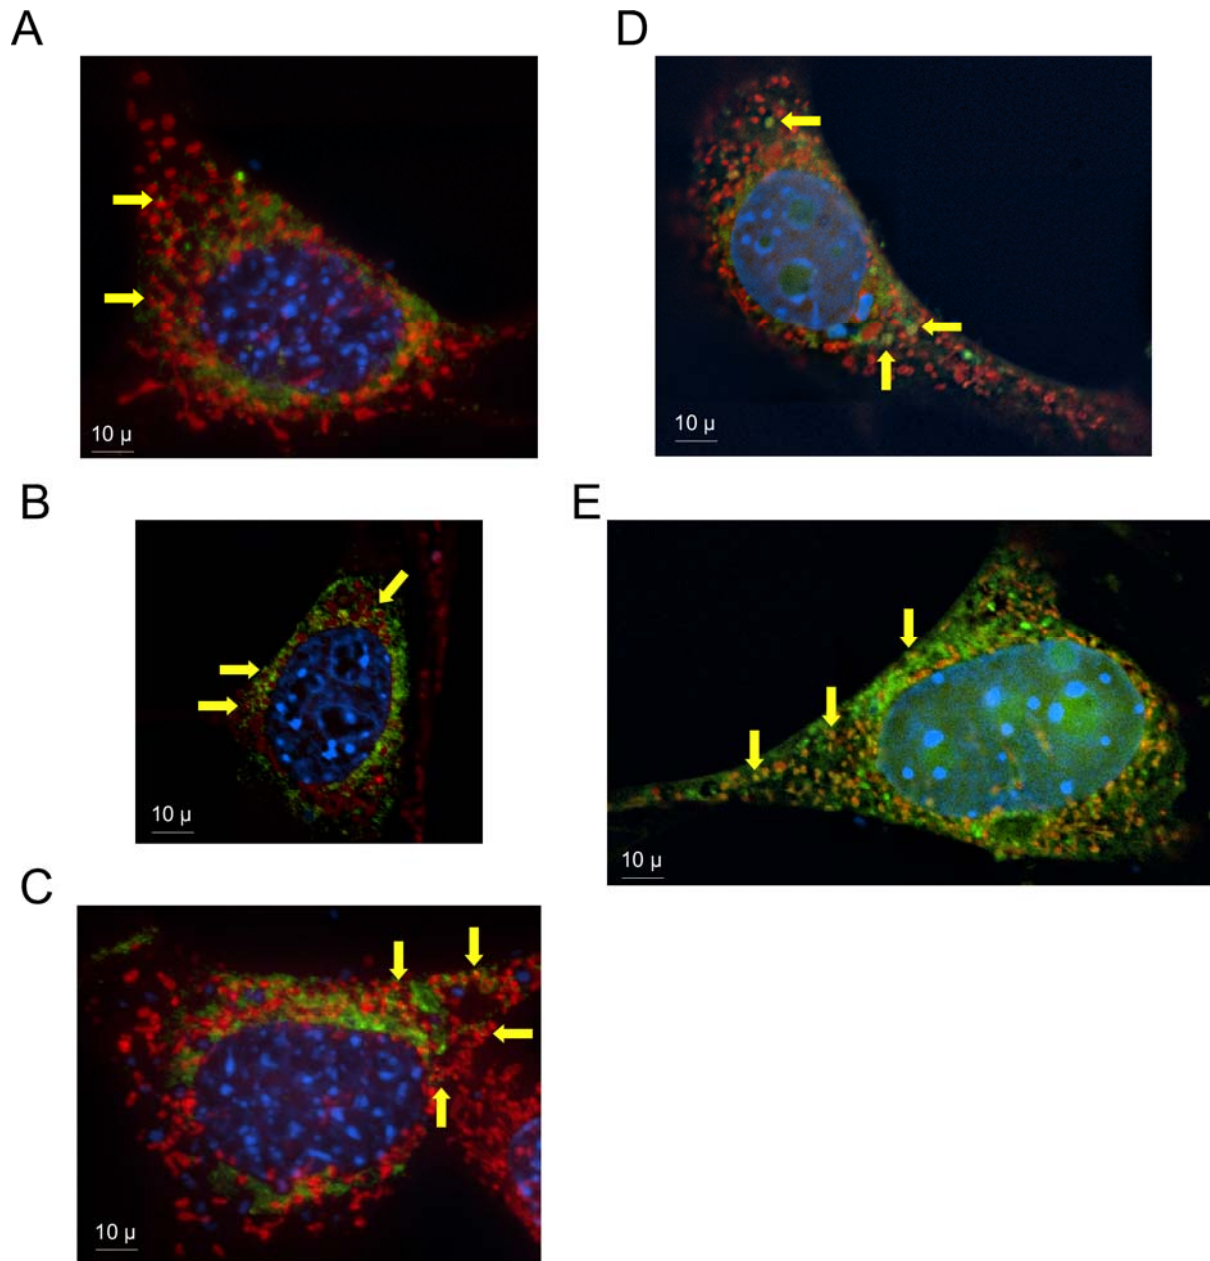

**Figure S2. Mitochondria and EGFP-CB2 co-localization.** (A, B, C) Non-stressed CCNC<sup>-/-</sup> MEF cultures transiently expressing EGFP-CB2 were stained with MitoTracker Red and DAPI to identify mitochondria and nuclei, respectively. Arrows indicate locations of EGFP-CB2-mitochondrial co-localization. Note the small foci on the edge of the mitochondrial signal. (D,E)

The same cells treated with cisplatin for 24 h. Note the extensive co-localization with the EGFP-CB2 signal decorating the entire fragmented mitochondria.

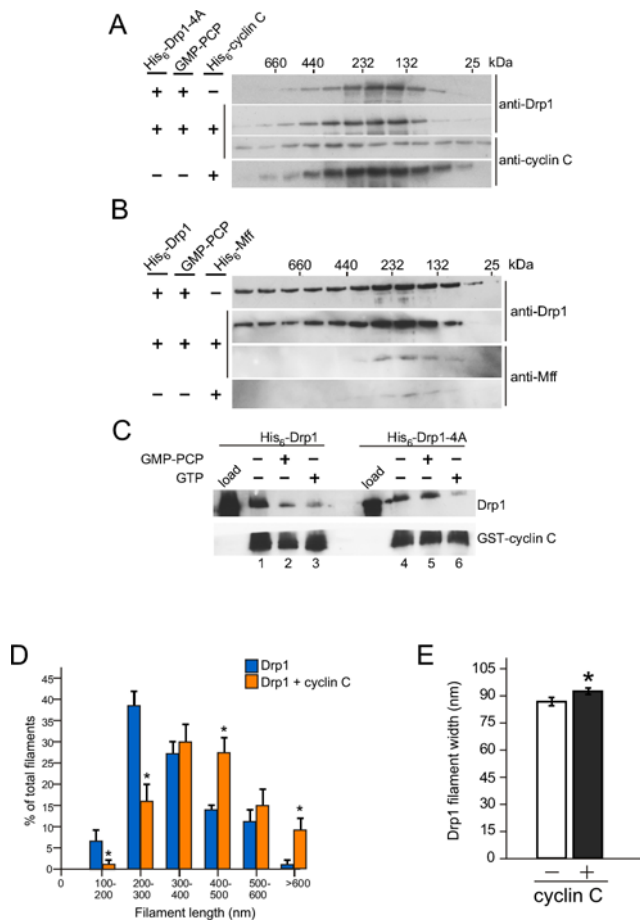

**Figure S3. Cyclin C associates with aggregate-defective Drp1 mutants.** (A) SEC fractions from His<sub>6</sub>-Drp1-4A (1 μM) + 2mM GMP-PCP/Mg<sup>2+</sup> without or with His<sub>6</sub>-cyclin C (5 μM) were blotted and probed for Drp1 and cyclin C as indicated. Molecular weight standards are indicated on the top of the panel. (B) As in (A) except wild-type His<sub>6</sub>-Drp1 (1 μM) and His<sub>6</sub>-Mff (5 μM) were analyzed. (C) His<sub>6</sub>-cyclin C was bound to His<sub>6</sub>-Drp1 or His<sub>6</sub>-Drp1-4A with GTP or GMP-PCP as indicated. Western blot analysis of His<sub>6</sub>-Drp1 or His<sub>6</sub>-Drp1-4A was used to monitor binding. The load (1/5 total added to the reaction) is provided as standard for Drp1 migration. The blot was stripped and reprobbed for cyclin C to control for similar addition to the binding reactions. (D) The percentages of filaments within specific lengths were plotted for Drp1 (blue) or Drp1 + cyclin C (orange) bars. Error bars are mean +/- SEM (n = 100). Asterisks indicate p < 0.05. (E) The width

of Drp1 filaments was measured with and without cyclin C. Error bars are mean  $\pm$  SEM ( $n = 100$ ). Asterisks indicate  $p < 0.05$ .

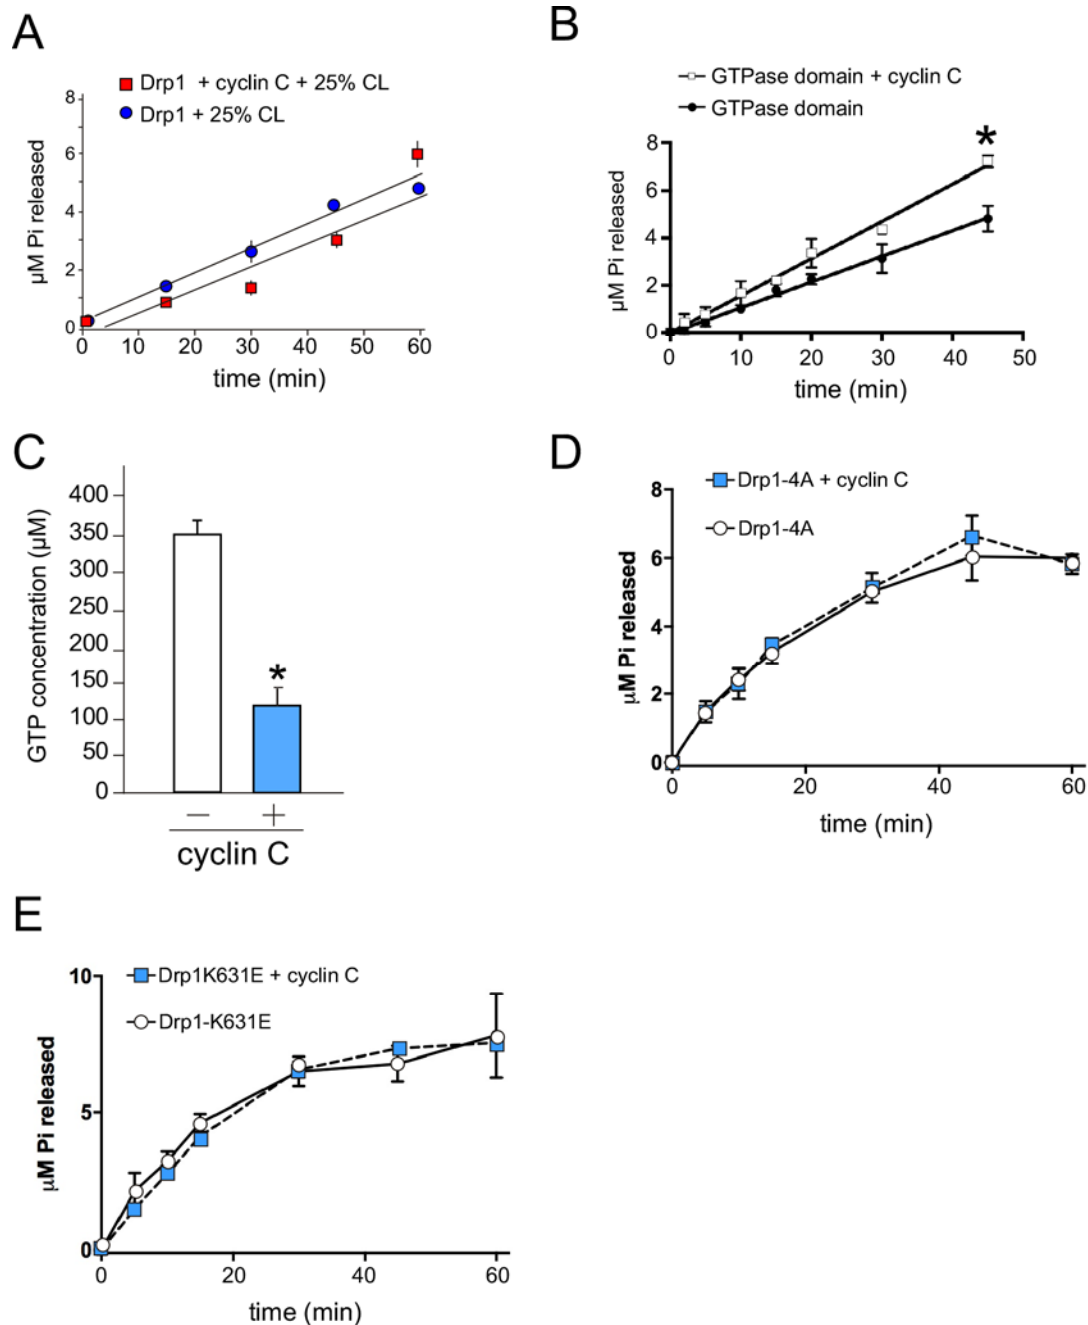

**Figure S4. Cyclin C stimulates GTPase domain activity but not filament defective mutants.** (A) GTPase activity was measured with  $1 \mu\text{M}$  Drp1 + 25% CL with and without  $5 \mu\text{M}$  cyclin C as indicated. (B) The experiments in (A) were repeated with the GTPase domain of Drp1 with  $0.5 \text{ mM}$  GTP. Asterisk indicates  $p < 0.01$ . (C)  $K_m$  calculation for GTP binding of the

GTPase domain with and without cyclin C. Asterisk indicates  $p < 0.02$ . (D, E) GTPase assays were conducted as before with the dimer only (Drp1-4A) and monomer only (K631E) derivatives with and without cyclin C as indicated.
